# Supplementary figures and images for: Genome-Wide Association Study of Body Weight Traits in Chinese Fine-Wool Sheep
Source: MDPI journal article supplement (doi:10.3390/ani10010170), 2020-01-19

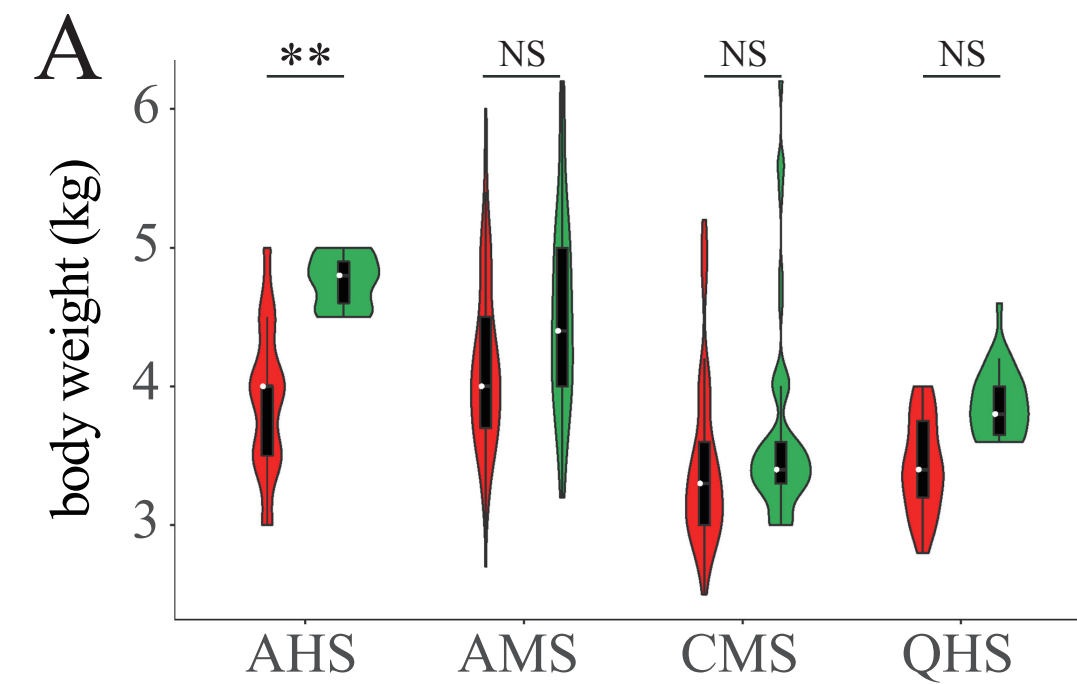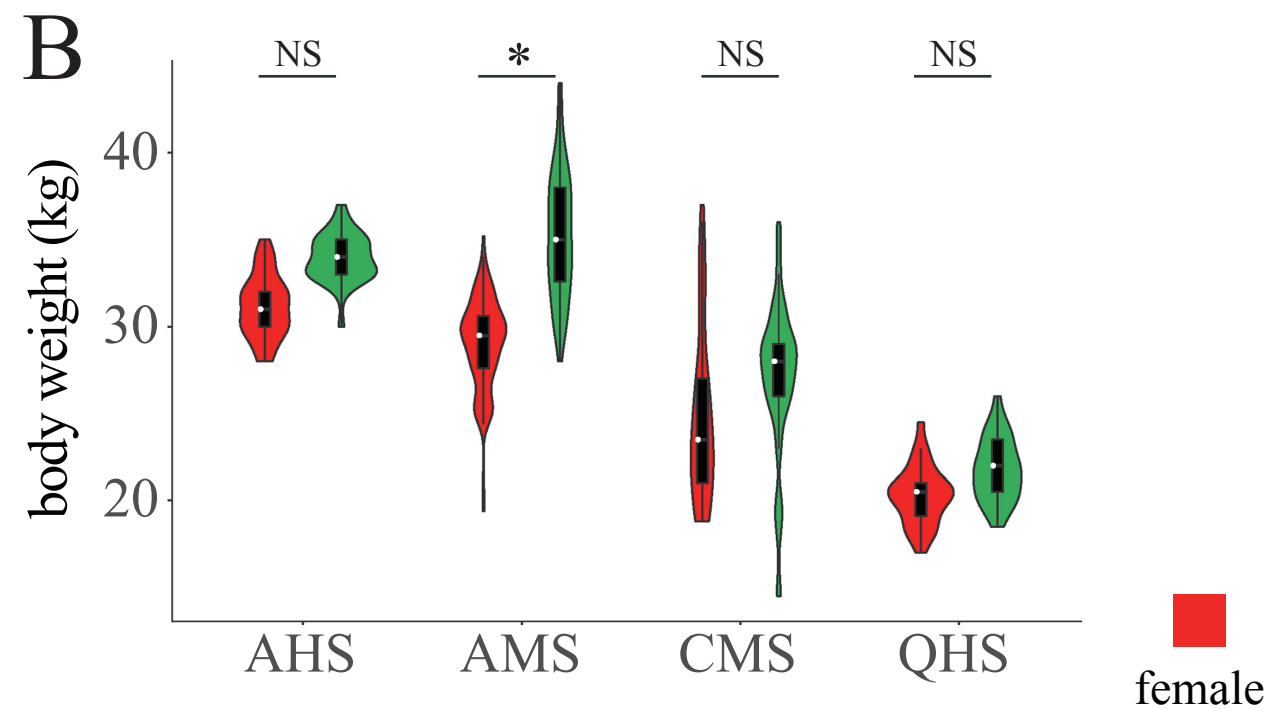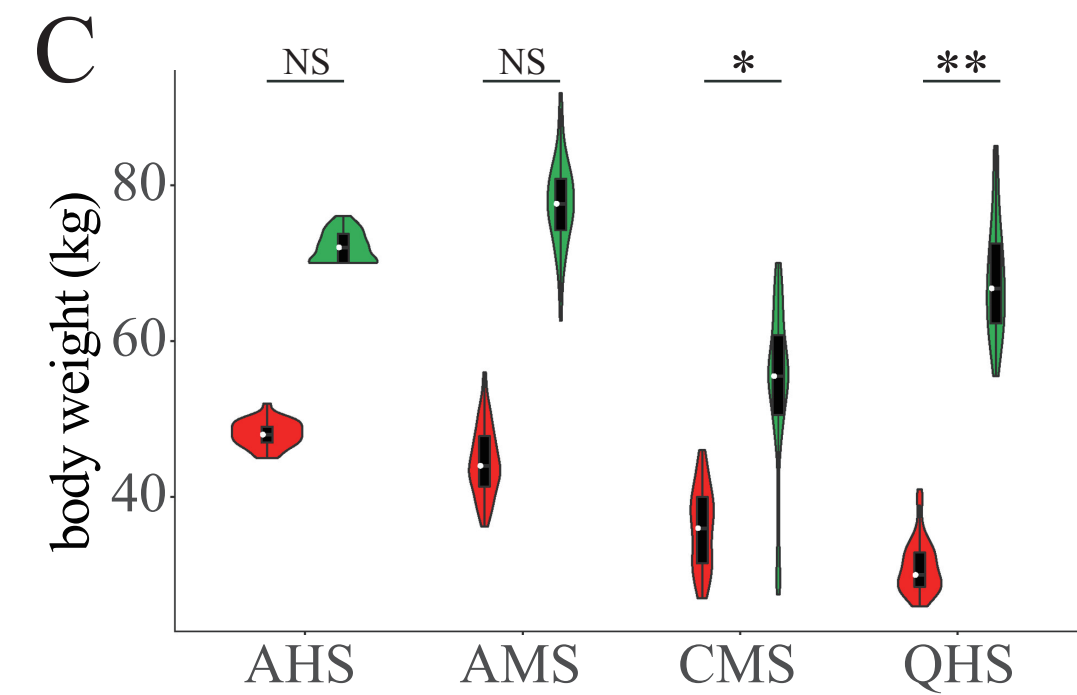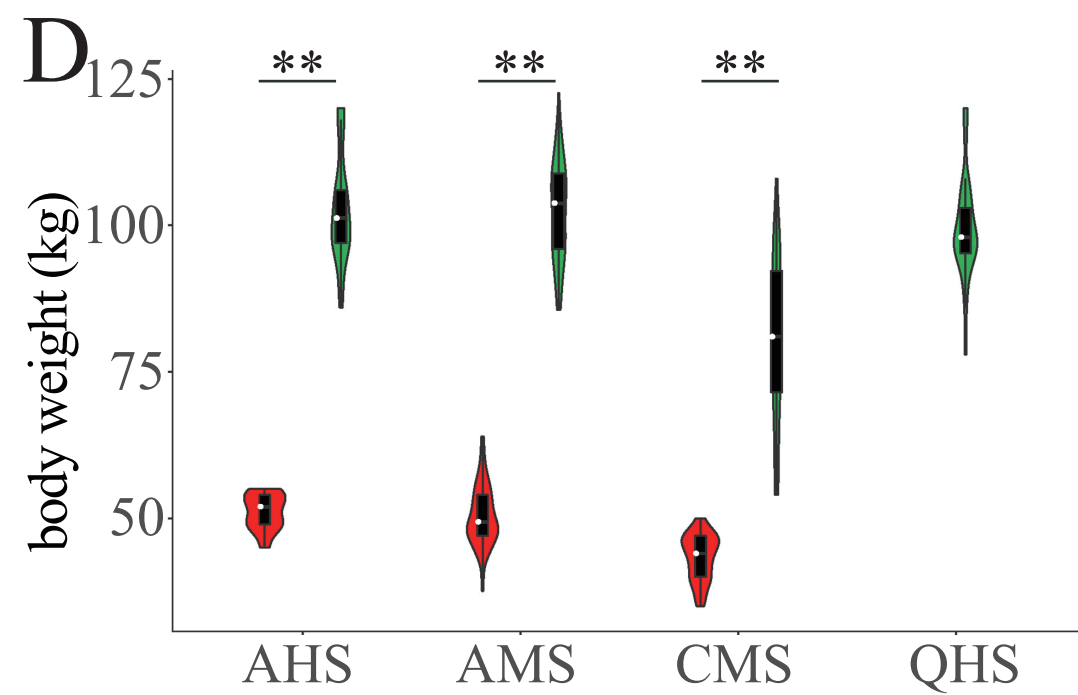

Supplement: s1 [file s1]

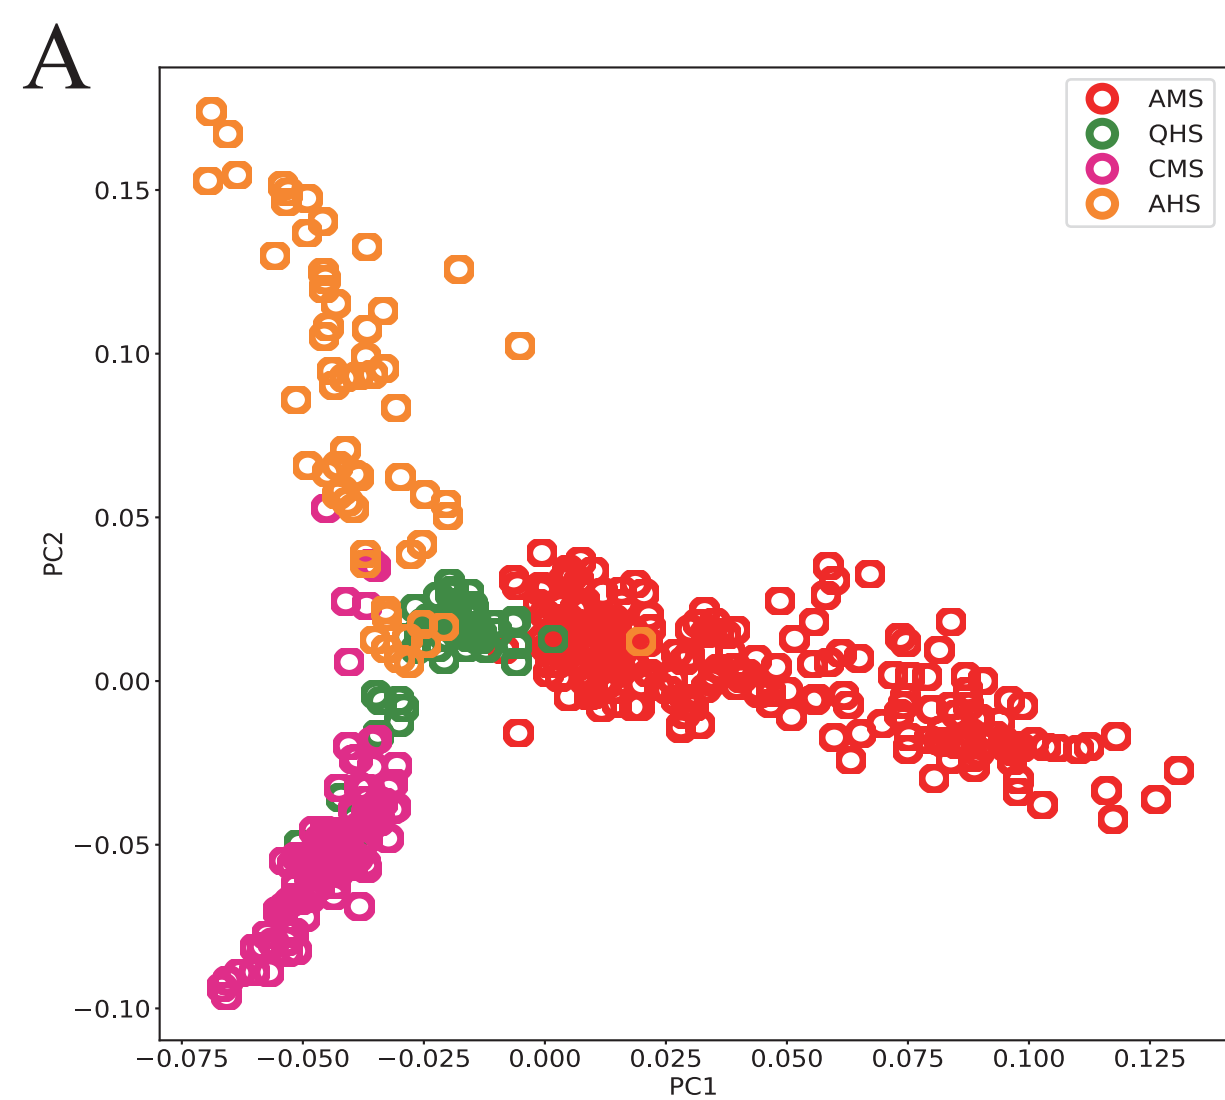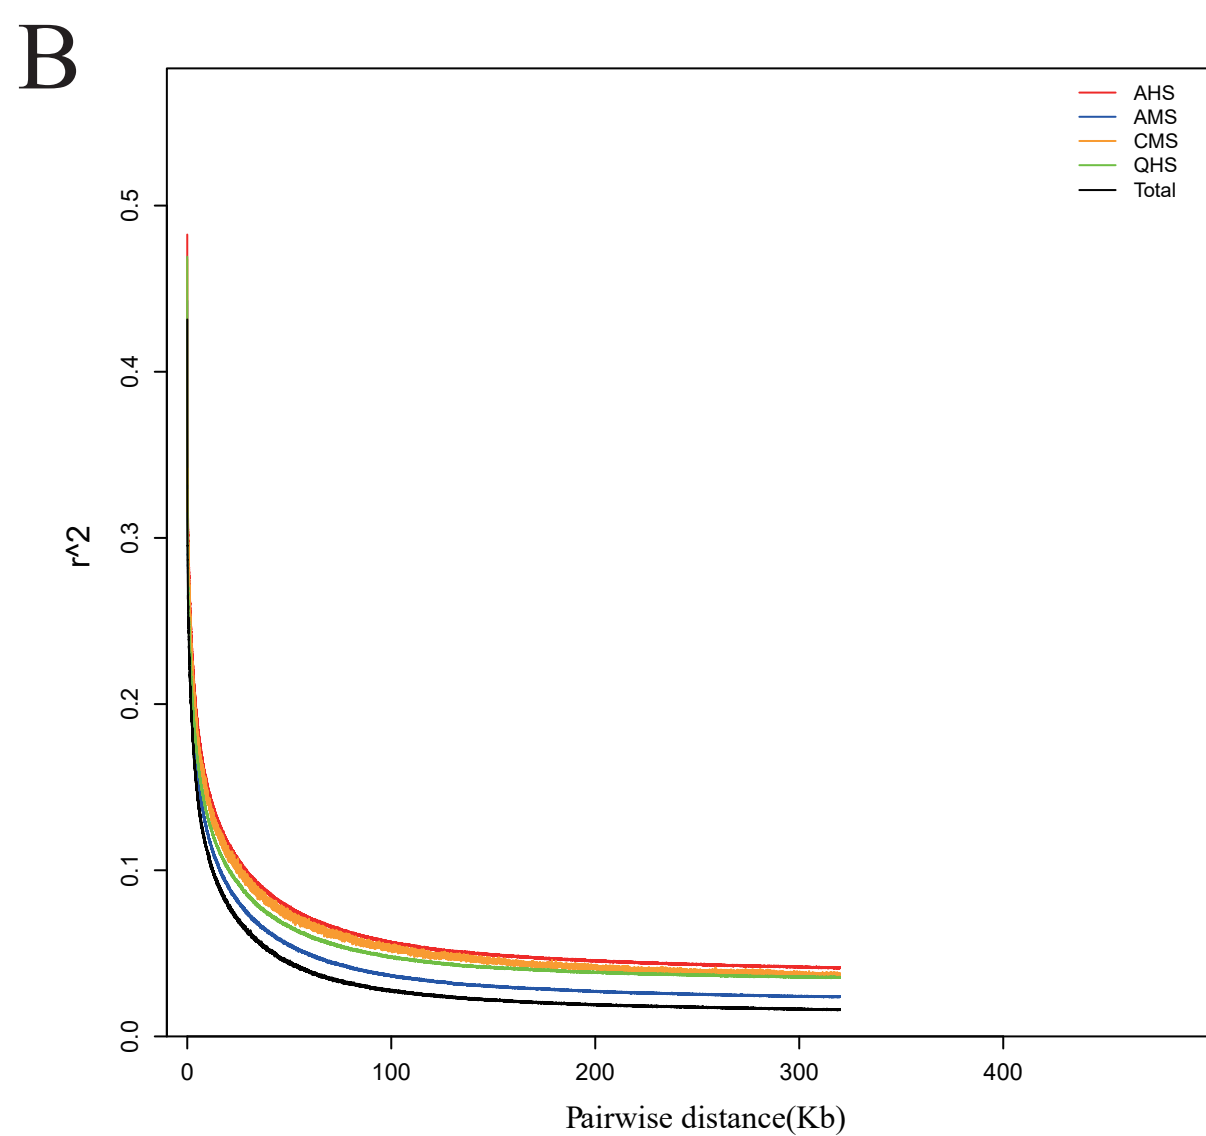

Supplement: s1 [file s1]
